## Scorecard diagnostic tool for the enabling regulatory environment of faecal sludge management

H. N. Mbogo<sup>a,\*</sup>, P. G. Home<sup>a</sup>, J. M. Raude<sup>a</sup> and R. W. Mwangi<sup>b</sup>

<sup>a</sup> Department of Soil, Water and Environmental Engineering, Jomo Kenyatta University of Agriculture and Technology, P.O. Box 62 000-00200 Nairobi, Kenya

<sup>b</sup> School of Computing and Information Technology, Jomo Kenyatta University of Agriculture and Technology, P.O. Box 62 000-00200, Nairobi, Kenya

\*Corresponding author. E-mail: hngugi@jkuat.ac.ke

 HNM, 0000-0002-2715-6158

### ABSTRACT

Expeditious situational analysis of the enabling regulatory environment (ERE) of faecal sludge management (FSM) is vital for strengthening sanitation systems. However, existing diagnostic tools employ broad indicators, neglecting the detailed assessment of the policy, legal and institutional frameworks for each step along the FSM chain. This paper presents a web-based integrated diagnostic tool for evaluating the quality and adequacy of policy in guiding equity, targeting of resources, quality of service, financial considerations and institutional roles and responsibilities. The tool evaluates the legal framework based on laws, standards and regulations emphasizing on means of enforcement. It evaluates the institutional framework based on investors, service providers, regulators and consumers as guided by the literature. Each indicator is assigned a score of 1: green (effective), 0.5: yellow (limited) and 0: red (poor) for the user interface, containment, emptying, transport, treatment, disposal and reuse of faecal sludge. Built on Laravel Framework Hypertext Preprocessor (PHP), the tool links the scores into a single index averaged into terciles as 0–0.33 (poor), 0.34–0.66 (limited) and 0.67–1 (effective). This helps to identify areas of priority in a given context. The tool successfully facilitated a participatory pilot study in Kenya based on individual stakeholders' opinion. However, the tool does not provide the specific details leading to a given score. Therefore, its application should precede a detailed evaluation of each indicator in order to generate specific details per indicator per step of FSM.

**Key words:** effectiveness, enabling regulatory environment, scoring criteria, FSM chain, single index

### HIGHLIGHTS

- An open-access web-based scorecard diagnostic tool for a participatory situational analysis of the enabling regulatory environment of faecal sludge management.
- Employs key performance indicators and scoring criteria to facilitate a detailed assessment of the policy, legal and institutional frameworks.
- Specifically assesses the quality of the policy frameworks.
- Speeds up the identification of areas of priority.

## GRAPHICAL ABSTRACT

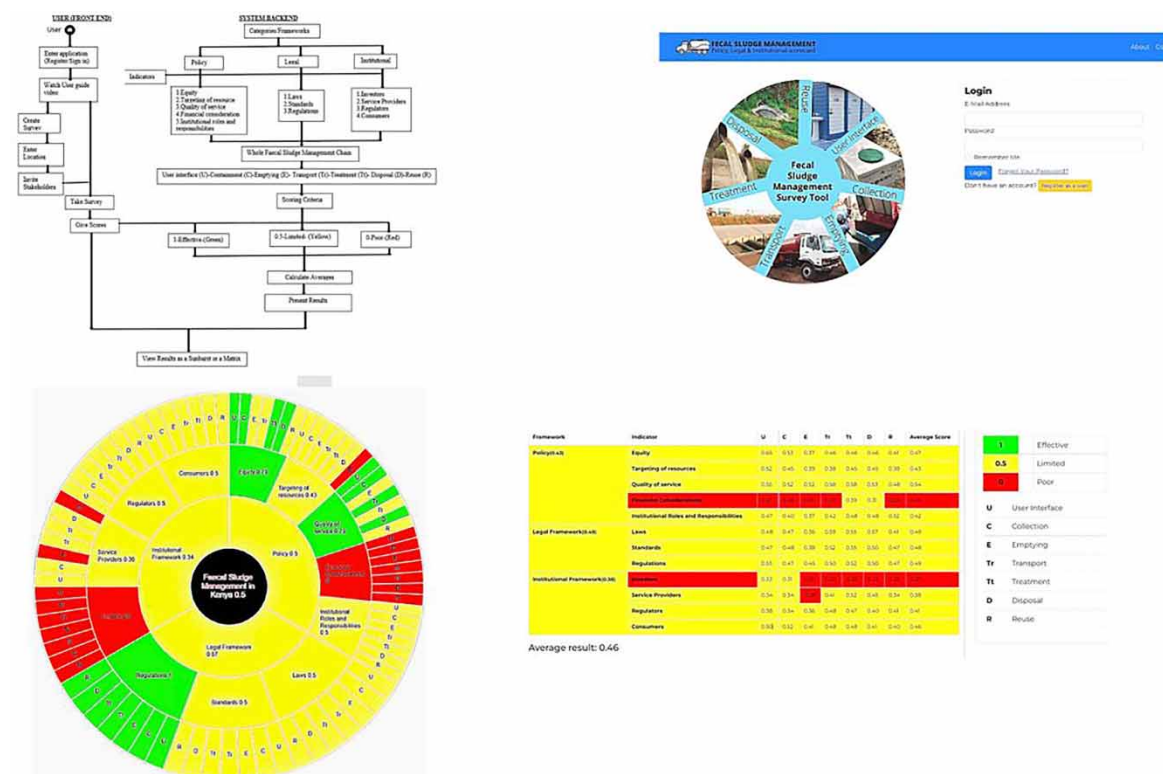

## INTRODUCTION

Achievement of the sustainable development goal (SDG), target 6.2.1, on safely managed sanitation services for all by 2030 requires an all-inclusive sanitation approach that combines both sewerage and non-sewerage sanitation services (UNICEF & WHO 2020). However, 46% (3.6 billion) of the global population lacked access to these services by 2020 and at the current rate of acceleration, more than 2.8 billion people might miss this target (WHO | UNICEF JMP 2021). Nevertheless, with more than 3.1 billion people using onsite sanitation technologies worldwide, non-sewered systems are driving considerable progress in achieving this goal especially in developing countries. The number of people using onsite sanitation technologies is expected to grow to 5 billion by 2030 (Strande *et al.* 2014).

However, poorly managed non-sewered sanitation facilities pose great human and environmental health risks along the whole faecal sludge management (FSM) chain. The FSM chain consists of the user interface (toilet), containment, emptying, transport, treatment, reuse and/or disposal of faecal sludge (Strande *et al.* 2014). Therefore, the measures needed to protect human and environmental health should be clearly laid out in an effective regulatory framework and firmly enforced along the whole FSM chain (Bassan 2014). Most developing countries lack such clear regulatory frameworks to address each step along the FSM chain. Others lack specific guidelines, regulations or national standards to specifically address FSM (ESAWAS Regulators Association 2019). In other countries where multisectoral-based regulatory frameworks exist, standards and the regulations are often ignored in practice due to unclear mandates among the several regulatory agencies (Burr & Waititu 2018). Thus, FSM services end up neglected both in delivery and in regulation along the entire chain. In addition, lack of rules, reporting mechanism and enforcement procedures have led to difficulties in tracing the past trends and the current outcomes of FSM in most developing countries (Jayathilake *et al.* 2019).

An enabling regulatory environment outlines the who, the how and the what to regulate for inclusive service provision. It consists of the policy, legal and institutional arrangements including the regulatory tools and instruments required (Coglianese 2012; ESAWAS Regulators Association 2019). For an enabling regulatory environment to successfully promote sustainable FSM services, it needs to be effective to achieve its planned goals (Kirkpatrick & Parker 2004). The World Health Organization (WHO) recommends a situational analysis

of existing policies, legislation and practice as the first step towards achieving safely managed sanitation services for all (WHO 2018). The policy, the legal and the institutional considerations should be evaluated holistically for the entire FSM chain but singly and exhaustively for each step (Bassan 2014). In addition, rapid assessment of sanitation policies is recommended for every country in order to assess their adequacy and effectiveness in responding to the prevailing sanitation situations (African Ministers' Council on Water (AMCOW) 2021).

Unfortunately, only a few developing countries apply some form of assessment on the enabling regulatory environment and where it is applied, the methods adopted are usually partial and unsystematic (Kirkpatrick & Parker 2004). Measuring effectiveness involves comparing a given phenomenon to the best practice or standard of high performance (Stake & Schwandt 2011). Diagnostic tools facilitate the comparison between current and preferred status in order to identify areas of improvement. They utilize a set of indicators to measure the relevant outcomes of concern and a research design to support the conclusions (Olivier 2017). There exist innumerable diagnostic tools for evaluating different aspects of the enabling environment of water, sanitation and hygiene (WASH). Some are described in the sanitation tool compendium (Dey *et al.* 2016) and others in the mapping of WASH sustainability tools (Schweitzer *et al.* 2014). However, there isn't a sanitation sector-wide consensus on a common framework or the number or scope of aspects to be evaluated (Gensch & Tillett 2019).

Some of the existing tools such as World Bank's City Services Delivery Assessment (CSDA) (Ross *et al.* 2016) and Sector Functionality Framework (SFF) (WSUP 2019) employ broad indicators such as enabling, developing and policy/mandates, which subsume the critical elements of the enabling regulatory environment into the broader indicators. Others such as the Global Analysis and Assessment of Sanitation and Drinking Water (UN-Water (GLAAS) and World Health Organization 2019) and the WASH Bottlenecks Analysis Tool (UNICEF 2020) integrate FSM into the general WASH provision. This neglects the detailed assessment of the policy, legal and institutional frameworks, particularly the quality and adequacy of the policy framework as guided by the Guidelines for the Assessment of National Sanitation Policies (Elledge *et al.* 2002; Water Supply and Sanitation Collaborative Council and World Health Organization 2005; ESAWAS Regulators Association 2019; AMCOW 2021). Other tools fail to include all the steps of FSM from the user interface to reuse. Others combine disposal and reuse as a single step overlooking the fact that disposal and reuse of faecal sludge and its products should be guided and regulated differently since they pose differing human and environment health risks (Strande *et al.* 2014; WHO 2018).

Therefore, this paper presents the contents, development and web-testing process of Faecal Sludge Management; Policy, Legal and Institutional (FSMPLI) Scorecard tool. This is an integrated web-based diagnostic tool for evaluating the effectiveness of the three critical elements of the enabling regulatory environment along the entire FSM chain. The paper also presents the results of a pilot study in Kenya where the scorecard tool was tested for applicability.

## METHODS

### Defining the indicators, conditions and criteria

Indicators are the factors used to denote the degree to which the three elements of the enabling regulatory environment meet their objectives based on their existing state or output. The factors were defined by identifying the suitable attributes and the expected standards of each element based on the literature (Coglianese 2012). A three-point Likert-type of scale was applied where the ideal condition of each indicator formed the stem statement, while the three-response scale formed the scoring criteria (Johns 2010). Each criteria was assigned a value and colour code as 1 (green) for effective, 0.5 (yellow) for limited and 0 (red) for poor (Ross *et al.* 2016) as in Table 1.

### The policy framework

A policy is a statement of intent, a commitment, a principle or a rule that guide decision making to achieve a given outcome. It serves as key stimulus for local action and create conditions within which FSM stakeholders operate (Elledge *et al.* 2002; AMCOW 2021). The policy framework was assessed through five of the seven key elements applicable for the entire sanitation service chain (Water Supply and Sanitation Collaborative Council and World Health Organization 2005; ESAWAS Regulators Association 2019). The five indicators included equity, targeting of resources, quality of service, financial considerations and institutional roles and responsibilities (Elledge *et al.* 2002). Health and environmental considerations were incorporated into quality of service because quality of any sanitation service affects human and environmental health (Bassan 2014). The regulation

**Table 1** | Indicators, conditions and criteria

| Indicator                                | Conditions                                                                                                                                                   | Criteria                                                                                                                                                                                                                                                                                                                                                                                                                                                                                                                                                                                                                                                             |
|------------------------------------------|--------------------------------------------------------------------------------------------------------------------------------------------------------------|----------------------------------------------------------------------------------------------------------------------------------------------------------------------------------------------------------------------------------------------------------------------------------------------------------------------------------------------------------------------------------------------------------------------------------------------------------------------------------------------------------------------------------------------------------------------------------------------------------------------------------------------------------------------|
| <b>Policy framework</b>                  |                                                                                                                                                              |                                                                                                                                                                                                                                                                                                                                                                                                                                                                                                                                                                                                                                                                      |
| Equity                                   | Guidance for steering resources and service provision to all citizens and support for inclusive participation provided                                       | <p>■ Clear and specific guidance for inclusive service provision and inclusive participation supported</p> <p>(0.5) Guidance for inclusive service provision is provided but not clear or specific and inclusive participation somehow supported</p> <p>□ Little or No guidance for inclusive service provision and/or inclusive participation is not supported</p>                                                                                                                                                                                                                                                                                                  |
| Targeting of resources                   | Specific FSM service need and its impact outlined with targets and timelines specified                                                                       | <p>■ Service need clearly stated and Targets clearly specified</p> <p>(0.5) Service need and targets stated but not clear or specific</p> <p>□ No/unclear service need and no/unspecific targets stated</p>                                                                                                                                                                                                                                                                                                                                                                                                                                                          |
| Quality of service                       | Minimum acceptable level of service in terms of health, safety and environmental standards and how they would be achieved, regulated and monitored specified | <p>■ Comprehensive Requirements for specified health, safety and environmental risks provided, interventions on how to achieve all the standards provided and means and procedures for monitoring specified</p> <p>(0.5) Some requirements to address health, safety and environmental risks provided, some interventions on how to achieve some of the standards provided and some means and procedures for monitoring specified but not comprehensively</p> <p>□ No Requirements to address any health, safety and environmental risks provided, no interventions on how to achieve the standards provided and no means or procedures for monitoring specified</p> |
| Financial considerations                 | FSM need costed, incorporated in investment plans and payment for services guided                                                                            | <p>■ Need costed, clearly outlined in public financial plans and payment for services clearly guided</p> <p>(0.5) Need not costed adequately, partially included in budget/financial plans and payment for services somewhat guided</p> <p>□ Need not costed nor outlined in budget/plans and payment for services not guided</p>                                                                                                                                                                                                                                                                                                                                    |
| Institutional roles and responsibilities | Roles and responsibilities of public, private and non-state actors defined, capacity development addressed and consultations among stakeholders supported    | <p>■ Roles and responsibilities clearly defined, capacity development clearly addressed and stakeholder consultations supported</p> <p>(0.5) Roles and responsibilities not clearly defined/overlap, capacity development not clearly addressed and stakeholder consultations not clearly supported</p> <p>□ Roles and responsibilities not defined, capacity development not addressed and stakeholder consultations not supported</p>                                                                                                                                                                                                                              |
| <b>Legal framework</b>                   |                                                                                                                                                              |                                                                                                                                                                                                                                                                                                                                                                                                                                                                                                                                                                                                                                                                      |
| Laws                                     | Laws exists specifying the incentives, Sanctions (Penalties) and means to enforce accountability provided                                                    | <p>■ Up to date Laws exists and enforcement tools clearly defined</p> <p>(0.5) Laws and enforcement tools exists but not quite clear/inadequate/outdated</p> <p>□ No laws exists nor any enforcement tools defined</p>                                                                                                                                                                                                                                                                                                                                                                                                                                               |

*(Continued.)*

**Table 1** | Continued

| Indicator                      | Conditions                                                                                                                                                                 | Criteria                                                                                                                                                                                                                                                                                                                                                                                                                                                                      |
|--------------------------------|----------------------------------------------------------------------------------------------------------------------------------------------------------------------------|-------------------------------------------------------------------------------------------------------------------------------------------------------------------------------------------------------------------------------------------------------------------------------------------------------------------------------------------------------------------------------------------------------------------------------------------------------------------------------|
| Standards                      | Norms, standards and guidelines exist, published and applied                                                                                                               | <p>■ Specific and clear standards and guidelines exist, are published and applied</p> <p>(0.5) Some standards and guidelines exist but not adequately applied</p> <p>□ No standards and guidelines exist or applied</p>                                                                                                                                                                                                                                                       |
| Regulations                    | Regulatory framework exists incorporating the set standards, guides payment of services and specifies means of enforcement                                                 | <p>■ Clear, updated regulations exist, including the standards, tariff guidelines and clear means of enforcement</p> <p>(0.5) Some regulations exist but without clear standards or tariff guidelines and means for enforcement not very clear or are outdated</p> <p>□ No regulations at all or if they exist have not included standards or tariff guidelines and no means of enforcement specified</p>                                                                     |
| <b>Institutional framework</b> |                                                                                                                                                                            |                                                                                                                                                                                                                                                                                                                                                                                                                                                                               |
| Investors                      | FSM need is funded and progress monitored adequately                                                                                                                       | <p>■ Adequate investment to meet FSM need to achieve the set target and progress is monitored regularly</p> <p>(0.5) Some investment to meet FSM need but not adequate to achieve the set target and progress is monitored but not regularly</p> <p>□ No or very little investment to meet FSM need to achieve the set target and no monitoring is done</p>                                                                                                                   |
| Service providers              | Service providers have the technical, operational and strategic capacity, meets demand and targets and compliance to standards, protecting public and environmental health | <p>■ Adequate capacity, meets all demand and targets and compliance to standards</p> <p>(0.5) Inadequate capacity, meets some quantified demand and compliance to standards</p> <p>□ No/very little capacity, meets no/unquantifiable demand and compliance to Standards unverified/unknown/none</p>                                                                                                                                                                          |
| Regulators                     | Independent regulator(s), regulates quality and payment of services, monitors service provision and enforces the legal requirements effectively                            | <p>■ Regulator(s) independent, regulates quality and payment for service, monitors service provision and enforces adequately effectively</p> <p>(0.5) Regulator(s) independent, regulates quality and/or payment of services, monitors and enforces for compliance but not adequately</p> <p>□ No regulator or regulator(s) not independent or regulator offers low or no regulation of quality or payment of service, little/no monitoring or enforcement for compliance</p> |
| Consumers                      | Consumers are available, are willing to pay and have a means to seek redress                                                                                               | <p>■ Consumers are available, are willing and can afford to pay and means to seek redress is/are available and efficient</p> <p>(0.5) Consumers are available, are willing but not all can afford to pay and means to seek redress is/are available but not quite efficient</p> <p>□ Very few if any Consumers are available and/or willing to pay; means to seek redress is/are unavailable/inefficient</p>                                                                  |



and monitoring aspects of the policy were also incorporated into the quality of service since monitoring assesses progress while regulation ensures quality and efficiency of sanitation services. The capacity development aspects were incorporated into institutional roles and responsibilities since capacity development involve improving the ability of different institutions to perform their assigned roles (AMCOW 2021).

### The legal framework

The legal framework is a broad set of constitutional, legislative, regulation, jurisprudential and managerial rules that facilitate the implementation and the enforcement of policies. For it to be effective, it should include clear roles and responsibilities for each stakeholder (ACE Project 2021). It should also incorporate requirements for compliance and means for enforcement. These include licensing procedures, monitoring and reporting mechanisms, performance indicators, penalties and sanctioning procedures for non-compliance as well as incentive for outstanding performance (Kameri-Mbote & Akech 2011). The legal framework was evaluated by the existence and operationalization of laws, standards and regulations with an emphasis on incentives, penalties and sanctioning procedures employed (SNV and ISF-UTS 2016; WHO 2018; ESAWAS Regulators Association 2019).

### The institutional framework

The institutional framework comprises the different organizations and other stakeholders involved in FSM services provision. Effective institutional frameworks facilitate the design, delivery, regulation and consumption of FSM services (Mumssen *et al.* 2018). It was evaluated based on operationalization of the roles and responsibilities of the actors of FSM (investors, service providers, regulators and consumers) in implementing the policy framework and enforcing the legal framework (Chua *et al.* 2005).

### Tool development

The web-based scorecard diagnostic tool was built using the Laravel Framework Hypertext Preprocessor (PHP) for server-side processing. Laravel (PHP) is one of the most popular open-source web development frameworks. It is flexible, secure and it supports rapid application development (McCool 2012). The data were stored in MySQL which is also a popular open-source Structured Query Language database management system. MySQL allowed addition, access and processing of the data stored in it, while offering a flexible programming environment (Christudas 2019). The tool was organized into models as described in Table 2.

The results in FSMPLI-Scorecard were displayed in either a sunburst or matrix chart developed on the Chart.js library. Chart.js is also a free open-source data visualization library used to create a wide range of responsive web-based visualization (Da Rocha 2019). The tool was hosted on an Apache web server with security-enhanced

**Table 2** | Models of FSMPLI-Scorecard in Laravel PHP

| Model        | Attributes                                                                             | Relationships in Laravel                                        | Description                                                                                                                                                                                      |
|--------------|----------------------------------------------------------------------------------------|-----------------------------------------------------------------|--------------------------------------------------------------------------------------------------------------------------------------------------------------------------------------------------|
| Category     | name, description                                                                      | 'HasMany' -> sections                                           | Specification of the elements and indicators of evaluation                                                                                                                                       |
| Location     | name, description                                                                      |                                                                 | Specification of the geographical location under study                                                                                                                                           |
| Result       | user_id, date, survey_id, status, date_started, date_completed                         | 'hasMany' -> SurveyTaking, 'hasOne' -> Survey, 'hasOne' -> User | Provision for graphical representation of the results in a sunburst or in matrix format                                                                                                          |
| Section      | name, description, category_id, A, B, C                                                | 'hasMany' -> SurveyTaking, 'hasOne' -> Category                 | Description of the three response levels of the scoring criteria for effective, limited and poor                                                                                                 |
| Survey       | title, description, location_id, status                                                | 'hasOne' -> Location                                            | Description of the title of the survey being undertaken                                                                                                                                          |
| Surveytaking | user_id, U, C, E, Tr, Tt, D, R, remarks, survey_id, section_id, category_id, result_id | 'hasOne' -> Category, 'hasOne' -> Section, 'hasOne' -> Survey   | Specification of the scores per indicator per element per step of the FSM chain from User interface (U), Containment (C), Emptying(E), Transport (Tr) Treatment (Tt), Disposal(D) and Reuse (R). |
| User         | name, email, phone, password, is_admin                                                 |                                                                 | Point for user and the administrator's authentication                                                                                                                                            |

Linux which enhances the mandatory access control policy. The mandatory access control denies unnecessary access to the web application but allows required access. This provides the web server functionality while limiting potential damage to it (Gosselin & Schommer 2001). A user is required to register as an administrator to set up a diagnostic survey for any predefined area of study. The administrator then invites the relevant stakeholders to give their opinion on the effectiveness for each indicator for each step along the FSM service chain. The tool has a user guide video developed at fiverr.com: a freelance platform offering digital services (Green *et al.* 2018). Figure 1 shows a flow chart for FSMPLI-Scorecard.

### Web testing

FSMPLI-Scorecard was tested for functionality using the PHP unit. Test protocols were created for each application unit including the category, location, result, section, survey and user. This was done by creating scenarios such as insert data, validation, update data, view data and delete data in each unit (Alrashed 2018). It was tested for browser compatibility with Internet Explorer, Edge, Firefox, Safari, Opera, Chrome, iOS and Android using power mapper (Mesbah 2014). The server IP address for FSMPLI-Scorecard was tested for loading and stress using artillery (Howe *et al.* 2021). It was also tested for security in terms of package vulnerabilities, Secure Socket Layer (SSL) access and directory access using a Laravel package to assess the ease of access by unauthorized users (Dahle 2020).

### Pilot study

Purposively selected stakeholders and FSM experts were invited to test the functionality of tool in application through a pilot study of the effectiveness of the regulatory environment of FSM services in Kenya. They included officials from government ministries, regulators, academia, non-state actors and service providers, as shown in

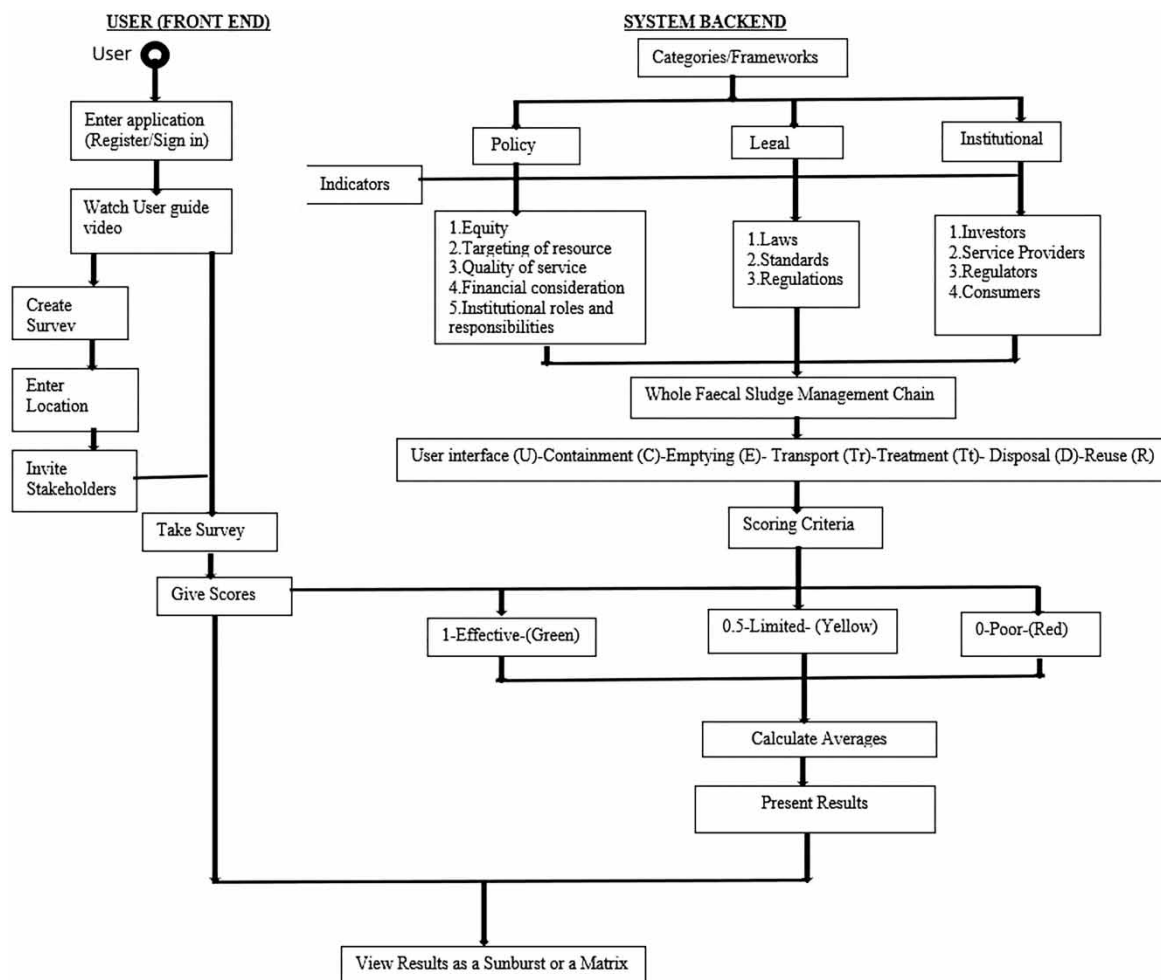

**Figure 1** | Flow chart for the FSMPLI-Scorecard diagnostic tool.

**Table 3** | Participants of the pilot study in Kenya

| Category                  | No. of respondents | Organization                                           |
|---------------------------|--------------------|--------------------------------------------------------|
| National Government       | 1                  | Ministry of Health                                     |
|                           | 1                  | Ministry of Water & Sanitation and Irrigation          |
|                           | 1                  | National Irrigation Authority                          |
| Regulator                 | 1                  | National Environment and Management Authority          |
|                           | 1                  | Water Services Regulatory Board                        |
| Standardization Agency    | 1                  | Kenya Bureau of Standards                              |
| Service provider          | 1                  | Nairobi City Water and Sewerage Company                |
| Non-state actors          | 2                  | Water and Sanitation for the Urban Poor                |
|                           | 1                  | Sanergy                                                |
| Private sector            | 1                  | Jiji Water Works Ltd                                   |
|                           | 1                  | Kenya Septage Emptiers Association                     |
| Capacity building network | 1                  | Water Capacity Network                                 |
| Academia                  | 3                  | Jomo Kenyatta University of Agriculture and Technology |
|                           | 1                  | University of Nairobi                                  |

**Table 3.** After an exposure to the tool in a stakeholders' workshop, the participants assigned each indicator a score of 1 for effective, 0.5 for limited or 0 for poor for each step along the FSM service chain based on their individual experiences and best of knowledge. The tool calculated the average score for each indicator, the average score for each element and the overall score as a single index.

## RESULTS AND DISCUSSION

### The content

The FSMPLI-Scorecard numerically evaluated the effectiveness of the three elements of the enabling regulatory environment to show areas of strength and weakness as well as identify areas of priority for each indicator along the FSM chain (Ross *et al.* 2016). It considered each step individually from the user interface, containment, emptying, transport, treatment, disposal and reuse (Strande *et al.* 2014). Considering each step ensures that the different actors, infrastructure and procedures applied per step are adequately addressed in the policy, legal and institutional frameworks (Bassan 2014). This consideration expanded the SFF (WSUP 2019) which evaluates the sanitation sector in general without narrowing down to the specific steps of FSM. It also expanded the World Bank's CSDA (Peal *et al.* 2014; Ross *et al.* 2016; Scott *et al.* 2019) which leaves out the user interface stage and also considers disposal and reuse as a single step.

FSMPLI-Scorecard not only examined the existence of a policy framework but assessed its quality based on the predefined key elements of sanitation policies (Elledge *et al.* 2002) and the African guidelines for sanitation policy (AMCOW 2021). By employing predefined and already published indicators, the tool allows local and contextualized interpretation of the indicators while maintaining their universal applicability. They are narrow in scope compared to other existing diagnostic tools (Schweitzer *et al.* 2014; Dey *et al.* 2016), to effectively facilitate a detailed assessment of each element. Table 4 shows the alignment and differences between FSMPLI-Scorecard and similar tools.

### FSMPLI-Scorecard tool

The open-access web-based FSMPLI-Scorecard diagnostic tool found at <http://fsmpli-scorecard.com/> facilitated an integrated participatory evaluation of the policy, legal and institutional frameworks of the FSM service chain based on predefined indicators and scoring criteria (Mansourian *et al.* 2011). It covered all the steps of FSM from the user interface (U), Collection (C), Emptying (E), Transport (Tr), Treatment (Tt), Disposal (D) and Reuse (R). The tool's front page is shown in Figure 2.

The tool can be used by any registered administrator at any internet supplied geographical location across the globe (Rogers *et al.* 2020). By integrating the different aspects of measurement, the tool facilitates a comprehensive situational analysis of the enabling regulatory environment. It rates the quality of each element according to



**Table 4** | The alignment and differences between FSMPLI-Scorecard and similar tools

| Tool                                                                                             | Objective                                                                                                                                                                                                                                                                                                                                                                                                                                                                                                                     | Alignment                                                                                                                                                                                                 | Difference/Improvement                                                                                                                                                                                                                                                                                                                                                                                                                                                                                                                                                                                                                                                                                                                                                                                                                                                                                                                                                                                                                                   |
|--------------------------------------------------------------------------------------------------|-------------------------------------------------------------------------------------------------------------------------------------------------------------------------------------------------------------------------------------------------------------------------------------------------------------------------------------------------------------------------------------------------------------------------------------------------------------------------------------------------------------------------------|-----------------------------------------------------------------------------------------------------------------------------------------------------------------------------------------------------------|----------------------------------------------------------------------------------------------------------------------------------------------------------------------------------------------------------------------------------------------------------------------------------------------------------------------------------------------------------------------------------------------------------------------------------------------------------------------------------------------------------------------------------------------------------------------------------------------------------------------------------------------------------------------------------------------------------------------------------------------------------------------------------------------------------------------------------------------------------------------------------------------------------------------------------------------------------------------------------------------------------------------------------------------------------|
| City Services Delivery Assessment (CSDA)                                                         | <ul style="list-style-type: none"> <li>Qualitative analysis of the quality of the enabling environment for FSM-based on nine indicators organized in three broad pillars: enabling, developing and sustaining.</li> <li>(attempts to cover all the six dimensions of governance however scattered and not organized as government support, legal and regulatory frameworks, institutional arrangement, skills and capacity, financial arrangements and social and cultural acceptance (Lüthi <i>et al.</i> 2011)).</li> </ul> | <ul style="list-style-type: none"> <li>Focus on assessment of the quality of the enabling environment of FSM</li> <li>Based on a three-scale Likert-type of scoring criteria</li> </ul>                   | <ul style="list-style-type: none"> <li>Narrows down to ERE of FSM</li> <li>Includes the user interface and separates Disposal and Reuse</li> <li>Improved and expanded the indicator on the availability of policy to focus on its quality and adequacy as guided by the Guidelines for the Assessment of National Sanitation Policies</li> <li>Assesses the institutional framework in terms of operationalized roles by service providers, investors, customers and regulators</li> <li>Assesses the legal framework by the existence and operationalization of laws, standards and regulations with an emphasis on incentives, penalties and sanctioning procedures employed</li> <li>Facilitates an individual stakeholder-based assessment but also integrates the scores to a participatory evaluation of ERE. It calculates the average score per indicator along the FSM Chain per participant, Average score per indicator across the participants and overall average score for the ERE per participant and among the participants.</li> </ul> |
| <ul style="list-style-type: none"> <li>Sector Functionality Framework (SFF)</li> </ul>           | <ul style="list-style-type: none"> <li>Assessment of the general sanitation Sector Functionality.</li> <li>Uses 21 broad qualitative indicators using four-level Likert-type scale: high, medium, low and zero</li> <li>Does not zero down to individual steps of the FSM chain</li> </ul>                                                                                                                                                                                                                                    | <ul style="list-style-type: none"> <li>Focus on assessment of the quality of the enabling environment of the general sanitation sector</li> <li>Based on Likert-type scale of scoring criteria</li> </ul> | <ul style="list-style-type: none"> <li>Narrows down to the enabling regulatory environment of FSM</li> <li>Focusses on each step of FSM</li> <li>Expands the broad indicator on policy/mandates and regulatory effectiveness</li> <li>Gives a quantitative score to the indicators for easier assessment</li> <li>Facilitates individualized yet participatory evaluation of ERE</li> </ul>                                                                                                                                                                                                                                                                                                                                                                                                                                                                                                                                                                                                                                                              |
| <ul style="list-style-type: none"> <li>Governance Capacity Framework (GCF) for Cities</li> </ul> | <ul style="list-style-type: none"> <li>Assessment and comparison of governance capacity for cities concerning water scarcity, flood risks, waste water and solid waste treatment and urban heat islands. Utilizes nine governance condition each defined by three indicators using five-level Likert-type of scoring scale ranging from very encouraging (++) to very limiting (-).</li> </ul>                                                                                                                                | <ul style="list-style-type: none"> <li>Focus on assessment of the quality of the enabling environment of various environmental issues</li> <li>Based on Likert-type scale of scoring criteria</li> </ul>  | <ul style="list-style-type: none"> <li>Narrows down to the enabling regulatory environment of FSM</li> <li>Focusses on each step of FSM</li> <li>Gives a quantitative score to the indicators for easier assessment</li> <li>Facilitates individualized yet participatory evaluation of ERE of FSM</li> </ul>                                                                                                                                                                                                                                                                                                                                                                                                                                                                                                                                                                                                                                                                                                                                            |

(Continued.)

Table 4 | Continued

| Tool                                                                                                                                                                                                                                        | Objective                                                                                                                                         | Alignment                                                                                                                                                                         | Difference/Improvement                                                                                                                                                                                                                                                                                    |
|---------------------------------------------------------------------------------------------------------------------------------------------------------------------------------------------------------------------------------------------|---------------------------------------------------------------------------------------------------------------------------------------------------|-----------------------------------------------------------------------------------------------------------------------------------------------------------------------------------|-----------------------------------------------------------------------------------------------------------------------------------------------------------------------------------------------------------------------------------------------------------------------------------------------------------|
| <ul style="list-style-type: none"><li>• Global Analysis and Assessment of Sanitation and Drinking Water (GLAAS)</li><li>• WASH Bottlenecks Analysis Tool (United Nations Childrens Fund (UNICEF) &amp; The World Bank Group 2014)</li></ul> | <ul style="list-style-type: none"><li>• Assessment of the enabling/ Limiting conditions on general Water, Sanitation and Hygiene (WASH)</li></ul> | <ul style="list-style-type: none"><li>• Focus on assessment of the quality of the enabling environment of WASH</li><li>• Based on Likert-type scale of scoring criteria</li></ul> | <ul style="list-style-type: none"><li>• Narrows down to the enabling regulatory environment of FSM</li><li>• Focusses on each step of FSM</li><li>• Gives a quantitative score to the indicators for easier assessment</li><li>• Facilitates individualized but participatory evaluation of ERE</li></ul> |

Governance Capacity Framework (GCF) for Cities (Koop *et al.* 2017).

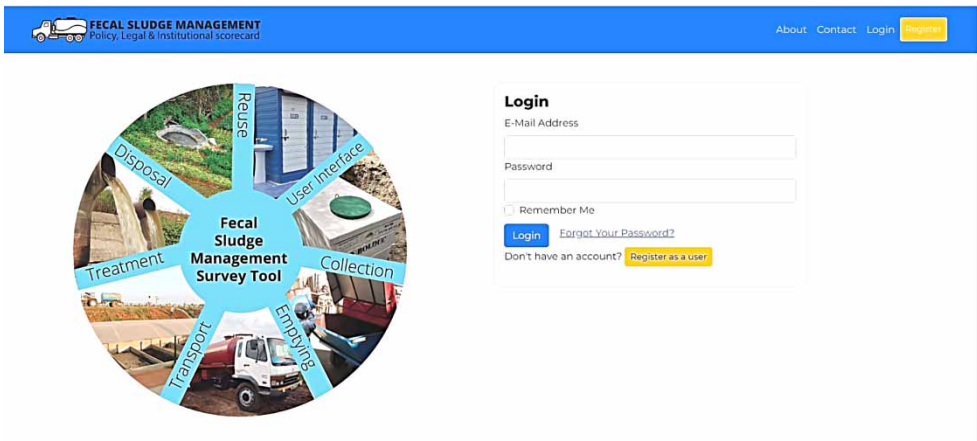

Figure 2 | FSMPLI-Scorecard web-based front page.

the predefined indicators and scoring criteria along the entire FSM service chain. This holistic diagnosis could reduce the time, resources and expertise required for the evaluation (Ross *et al.* 2016).

Presentation of results

The three Likert-type scale applied in FSMPLI-Scorecard sufficiently identified the indicators in need of improvement for each step, without necessarily breaking them into finer categories (Johns 2010). The predefined scoring criteria standardizes the meaning of the scores thus reducing ambiguity by providing a common understating of the scores among diverse stakeholders with diverse interest across the sector (Rogers *et al.* 2020). The tool calculates the average score for each indicator, then the average score for each element under diagnosis and the overall score as a single index. The overall score indicates the effectiveness of the enabling regulatory environment categorized in terciles as the following: 0–0.33 (poor), 0.34–0.66 (limited) and 0.67–1 (effective) (Meyer *et al.* 2019). This three-level numerical scale aims to qualitatively indicate areas of priority to stakeholders and not necessarily a quantitative evaluation (Ross *et al.* 2016).

The results are presented in charts using different colour codes of green for effective, yellow for limited and red for poor. This speeds up the visualization and interpretation of the outcome for each indicator. The presentation helps to establish the probable cause–effect relations for the score attained by a given indicator to the specific step of FSM (Burr & Waititu 2018). The tool is balanced in the sense that, the overall score is an average score of each element per indicator per step of FSM. This denotes an even distribution of weight among the elements and across the range of indicators (Kaplan & Norton 1992). The sunburst presentation of the results enhances the perception of each element and each indicator as important and the interrelationship between the elements is

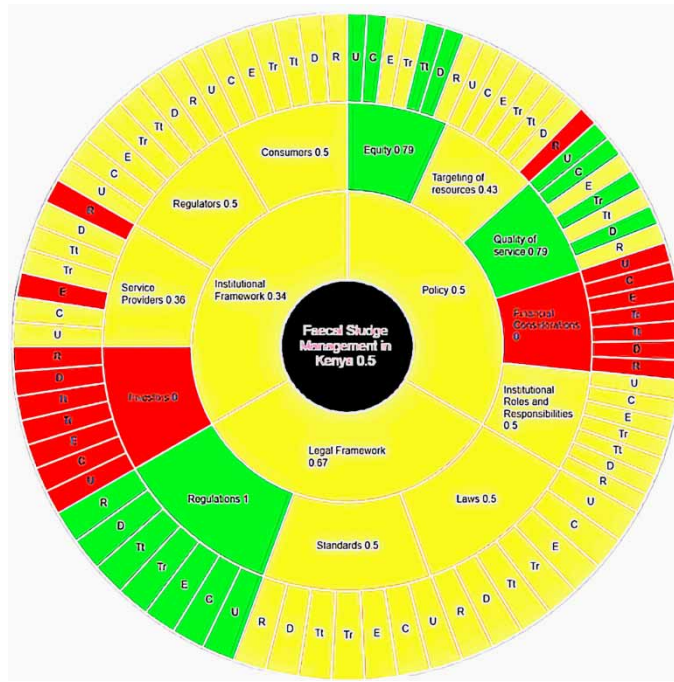

**Figure 3** | An example of a sunburst presentation of results in the FSMPLI-Scorecard tool.

implicitly understood (Schulz *et al.* 2011). Figure 3 shows an example of a sunburst presentation of results in FSMPLI-Scorecard tool. However, due to the chain nature of FSM services, the results can be presented in a matrix format as shown in Figure 4 depending on user preference.

### Tool web testing

All the units in the tool passed for functionality in all the scenarios tested. Therefore, the tool is expected to perform its functions such as inserting data, validation of data, updating data, viewing data and deleting data as it was designed to (Alrashed 2018). The tool was found compatible with all the browsers tested as shown in Table 5. Therefore, it can be accessed and applied through any of the stated browsers.

For the loading test, a ping to the server address returned with 0% loss of data in an approximate average round-trip of 158 ms. It was able to support 496 concurrent virtual users in 820.7 ms in the stress testing. Therefore, it was found reliable and capable of performing its functions satisfactorily regardless of a high number of concurrent users (Subraya & Subrahmanya 2000). In the security test, none of packages were found vulnerable to external attack and only the public directory is accessible from the browser since the projects code is stored in an accessible directory. Therefore, the tool is secure in terms of access from unauthorized users and external attacks (Kundu 2012).

| Framework                     | Indicator                                | U    | C    | E    | Tr   | Tt   | D    | R    | Average Score |
|-------------------------------|------------------------------------------|------|------|------|------|------|------|------|---------------|
| Policy(0.43)                  | Equity                                   | 0.65 | 0.53 | 0.37 | 0.46 | 0.46 | 0.46 | 0.41 | 0.47          |
|                               | Targeting of resources                   | 0.52 | 0.45 | 0.39 | 0.38 | 0.45 | 0.45 | 0.38 | 0.43          |
|                               | Quality of service                       | 0.55 | 0.52 | 0.52 | 0.58 | 0.58 | 0.53 | 0.48 | 0.54          |
|                               | Financial Considerations                 | 0.21 | 0.28 | 0.16 | 0.21 | 0.39 | 0.31 | 0.24 | 0.26          |
|                               | Institutional Roles and Responsibilities | 0.47 | 0.40 | 0.37 | 0.42 | 0.48 | 0.48 | 0.32 | 0.42          |
| Legal Framework(0.49)         | Laws                                     | 0.48 | 0.47 | 0.36 | 0.59 | 0.55 | 0.57 | 0.41 | 0.49          |
|                               | Standards                                | 0.47 | 0.48 | 0.38 | 0.52 | 0.55 | 0.50 | 0.47 | 0.48          |
|                               | Regulations                              | 0.53 | 0.47 | 0.45 | 0.50 | 0.52 | 0.50 | 0.47 | 0.49          |
| Institutional Framework(0.38) | Investors                                | 0.33 | 0.31 | 0.19 | 0.28 | 0.38 | 0.24 | 0.28 | 0.27          |
|                               | Service Providers                        | 0.34 | 0.34 | 0.28 | 0.41 | 0.52 | 0.45 | 0.34 | 0.38          |
|                               | Regulators                               | 0.38 | 0.34 | 0.36 | 0.48 | 0.47 | 0.40 | 0.41 | 0.41          |
|                               | Consumers                                | 0.50 | 0.52 | 0.41 | 0.48 | 0.48 | 0.41 | 0.40 | 0.46          |

Average result: 0.46

|     |           |
|-----|-----------|
| 1   | Effective |
| 0.5 | Limited   |
| 0   | Poor      |

- U User Interface
- C Collection
- E Emptying
- Tr Transport
- Tt Treatment
- D Disposal
- R Reuse

**Figure 4** | Results of the pilot study on the enabling regulatory environment by FSM stakeholders in Kenya.

**Table 5** | FSMPLI-Scorecard browser compatibility

| Browser         | IE | Edge | Firefox | Safari | Opera | Chrome | iOS     | Android |
|-----------------|----|------|---------|--------|-------|--------|---------|---------|
| Version         | 11 | 95   | 93      | 15     | 80    | 95     | ≤ 14 15 | 95      |
| Critical Issues | ✓  | ✓    | ✓       | ✓      | ✓     | ✓      | ✓       | ✓       |
| Major Issues    | ✓  | ✓    | ✓       | ✓      | ✓     | ✓      | ✓       | ✓       |
| Minor Issues    | ✓  | ✓    | ✓       | ✓      | ✓     | ✓      | ✓       | ✓       |

### Pilot testing

The enabling regulatory environment of FSM in Kenya received an average score of 0.47 through the multisectoral FSM stakeholders' opinion survey. The policy framework was rated as limited with an average score of 0.45, across the five indicators. However, financial considerations were found poor for most FSM services with an average score of 0.28. The legal framework was also rated as limited with an average score of 0.5 across the three indicators. The institutional framework was also found limited with a low score of 0.39. It was particularly found poor in terms of the investors for most FSM services as well as service providers for emptying services. The results as shown in [Figure 4](#) are in a matrix format.

The survey was carried out based on each participant's inherent knowledge and experience soon after the initial exposure to the scoring framework. It is therefore likely that they all did not have the necessary in-depth knowledge or prior experience with each element or similar understanding to give identical scores for each indicator per step of FSM services. They also probably did not have time to access and assess available evidence to score the indicators patently. However, the tool linked each stakeholder's opinion to give an average score per indicator per step and also an overall score for the enabling regulatory environment in Kenya. By linking these opinions together, the tool would improve the quality of the diagnosis and also avoid biased conclusions ([Rogers et al. 2020](#)).

However, there was no moderation for consensus building since it was a pilot test on the tool, but stakeholders' participation formed a basis for a sector-wide dialogue towards consensus building ([Rogers et al. 2020](#)). Therefore, the participants requested for a subsequent all-inclusive stakeholders' forum to discuss the outcome of the diagnosis towards a common ownership of the results. They also suggested to be provided with the scoring criteria prior to the survey, so as to consider available evidence for each indicator and to allow consultations among colleagues so as to present institutional-based perspectives.

### CONCLUSION AND RECOMMENDATIONS

FSMPLI-Scorecard evaluated the effectiveness of the enabling regulatory environment of FSM based on the indicators described in the Regulation Strategy and Framework for Inclusive Urban Sanitation Service Provision Incorporating Non-Sewered Sanitation Services developed by the Eastern and Southern African Water and Sanitation (ESAWAS) Regulators Association. However, it adapted, improved and expanded some broad indicators from several existing diagnostic tools such as the World Bank's CSDA and WSUP's SFF in order to specifically assess the quality of the policy framework according to the Guidelines for the Assessment of National Sanitation as provided by the Water Supply and Sanitation Collaborative Council and WHO. It also considered the African Sanitation Policy Guidelines provided by the African Ministers' Council on Water.

The tool was found functional in its application by successfully facilitating a participatory diagnosis of the effectiveness of the policy, legal and institutional frameworks of FSM services along the entire service chain. It proved effective in identifying areas of improvement across all the indicators along the entire chain. For instance, the financial considerations in the policy framework, the investors and service providers in the institutional framework were identified as the main priority areas of consideration in the Kenyan pilot study. However, the tool does not provide the specific details leading to a given score assigned to each indicator per step. Therefore, its application should precede a detailed evaluation of each indicator in a given context in order generate specific details per indicator per step of FSM. This would lead to development of evidence-based priorities towards an effective enabling regulatory environment of FSM services.



The open-access web-based FSMPLI-Scorecard can be reliably and safely applied to diagnose the enabling regulatory environment of any predefined study area such as a region, a country, a city or even a smaller geographical extent. However, it should be evaluated against a user's opinion and preferences.

Participation of the sector stakeholders, revealed diverse perspective and opinions on the current status of each indicator. This initiated the identification of priorities towards a joint commitment among the stakeholders for accelerated safely managed sanitation services for all. However, the tool does not dictate the specific remedial actions to be taken to improve the low scoring elements but it establishes the expected goal such that each respective arm or actor should adopt the most appropriate action plan to arrive to those goals.

To draw a more comprehensive and conclusive diagnosis, more and representative stakeholders should be invited to participate in the opinion survey. An all-inclusive stakeholders' forum should be held to discuss the outcome of the diagnosis towards a consensus building and a common ownership of the results. This would be essential for the development of coherent framework of actions for strengthening the policy, legal and institutional framework of FSM services in a given context.

### Ethical considerations and approval

Ethical aspects considered in this research included the following: informed voluntary participation, right to refuse or withdraw, confidentiality and privacy, risks and benefits and payment for participating in the study. They were presented in consent forms that were signed by each participant prior to data collection: The research was approved by the Jomo Kenyatta University of Agriculture and Technology Institutional Ethics Review Committee (JKUAT IERC); Ref. No. JKU/2/4/896B and was licensed by the National Commission for Science and Technology and Innovation (NACOSTI) Ref. No. 932560.

### ACKNOWLEDGEMENTS

FSMPLI-Scorecard was developed under a research (partially) funded by the African Doctoral Dissertation Research Fellowship (ADDRF) award offered by the African Population and Health Research Centre (APHRC) and funded by the Bill and Melinda Gates Foundations through a project grant to APHRC. We wish to appreciate our colleagues at the Jomo Kenyatta University of Agriculture and technology for their positive critique and suggestions throughout the study. We appreciate all the key interview informants, the validation workshop participants and their institutions for their invaluable contributions towards the development and testing of this tool. We acknowledge the contributory comments and suggestions of Rémi Kaupp of WaterAID UK during the development of the indicators and scoring criteria. We also appreciate, Mbitrix Technologies Limited for their partnership in the tool development.

### DATA AVAILABILITY STATEMENT

All relevant data are included in the paper or its Supplementary Information.

### REFERENCES

- ACE Project 2012 Legal Framework. Retrieved June 13, 2021, from <https://aceproject.org/ace-en/topics/lf/default>.
- African Ministers' Council on Water (AMCOW) 2021 *African Sanitation Policy Guidelines*.
- Alrashed, W. A. 2018 *Evaluating the Effectiveness of Web Application Testing Techniques Using Automated Tools*. McMaster University Hamilton, Ontario, Canada.
- Bassan, M. 2014 Institutional frameworks for faecal sludge management: faecal sludge management: systems approach for implementation and operation. In: L. Strande, M. Ronteltap & D. Brdjanovic (eds). *Faecal Sludge Management: Systems Approach for Implementation and Operation*. IWA Publishing, London, pp. 255-272.
- Burr, P. & Waititu, A. 2018 *Evaluation of Urban WASH Sector Functionality Kenya 2018 Baseline Report*.
- Christudas, B. 2019 Practical microservices architectural patterns. In: *Practical Microservices Architectural Patterns*. pp. 877-884. <https://doi.org/10.1007/978-1-4842-4501-9>
- Chua, C. E. H., Khoo, H. M., Straub, D. W., Kadiyala, S. & Kuechler, D. 2005 The evolution of e-commerce research: a stakeholder perspective. *Electronic Commerce Research and Applications* 6 (February), 262-280.
- Coglianesi, C. 2012 *Measuring Regulatory Performance – Evaluating the Impact of Regulation and Regulatory Policy*. Organisation for Economic Co-operation and Development (Vol. August).
- Dahle, T. 2020 *Large Scale Vulnerability Scanning Development of a large-scale web scanner for detecting vulnerabilities*. Thesis from Department of Informatics, Faculty of Mathematics and Natural Science, University of Oslo, Oslo, Norway.
- Da Rocha, H. 2019 *Learn Chart.js: Create interactive visualizations for the Web with Chart.js 2, 1st edn*. Packt Publishing Ltd, Birmingham, UK.



- Dey, S., Patro, S. A. & Rath, S. 2016 *Sanitation Tool Compendium*, vol. 53. Bengaluru, Karnataka, India.
- Elledge, M. F., Rosensweig, F., Warner, D. B., Austin, J. H. & Perez, E. A. 2002 *Guidelines for the Assessment of National Sanitation Policies*. Washington, DC.
- ESAWAS Regulators Association 2019 *Regulation Strategy and Framework for Inclusive Urban Sanitation Service Provision Incorporating Non-Sewered Sanitation Services*.
- Gensch, R. & Tillett, W. 2019 *Strengthening Sanitation and Hygiene in the Wash Systems Conceptual Framework Strengthening Wash Systems: Tools for Practitioners*, (August). pp. 1–32.
- Gosselin, M. J. & Schommer, J. 2001 *Confining the Apache Web Server with Security-Enhanced Linux*.
- Green, D. D., McCann, J., Thao, V., Lopez, N. & Ouattara, S. 2018 *Case study gig economy and the future of work*. *Management and Economics Research Journal* **4**, 281–288.
- Howe, C., Kraisingkorn, A. T. & Light-Hillary, N. 2021 *Artillery*. Available from: <https://www.npmjs.com/package/artillery> (accessed 18 November 2021)
- Jayatilake, N., Drechsel, P., Keraita, B., Fernando, S. & Hanjra, M. A. 2019 Guidelines and regulations for fecal sludge management from on-site sanitation facilities. *Resource Recovery and Reuse* (Vol. 2019).
- Johns, R. 2010 SQB methods fact sheet 1: Likert items and scales. *Survey Research Network* **1** (March), 1–11.
- Kameri-Mbote, P. & Akech, J. M. M. 2011 *Kenya: Justice Sector and the Rule of law: A Review by AfriMAP and the Open Society Initiative for Eastern Africa*.
- Kaplan, R. S. & Norton, D. P. 1992 The balanced scorecard - measures that drive performance. *Harvard Business Review* **70** (1), 71–79.
- Kirkpatrick, C. & Parker, D. 2004 *Regulatory impact assessment and regulatory governance in developing countries*. *Public Administration and Development* **344**, 333–344.
- Koop, S. H. A., Koetsier, L. & Doornhof, A. 2017 *Assessing the governance capacity of cities to address challenges of water, waste, and climate change*. *Water Resources Management* **31**, 3427–3443. <https://doi.org/10.1007/s11269-017-1677-7>.
- Kundu, S. 2012 Web testing: tool, challenges and methods. *International Journal of Computer Science Issues* **9** (2), 481–486.
- Lüthi, C., Morel, A., Tilley, E. & Ulrich, L. 2011 *Community-Led Urban Environmental Sanitation Planning: CLUES – Complete Guidelines for Decision-Makers with 30 Tools*.
- Mansourian, A., Taleai, M. & Fasihi, A. 2011 A web-based spatial decision support system to enhance public participation in urban planning processes, 8596. <https://doi.org/10.1080/14498596.2011.623347>.
- McCool, S. 2012 *Laravel Starter*. Packtlib.
- Mesbah, A. 2014 Automated cross-browser compatibility testing Automated Cross-Browser Compatibility Testing, (May), 561–570.
- Meyer, A. M., Siri, G., Becker, I., Betz, T., Bödecker, A. W., Robertz, J. W., Krause, O., Benzing, T., Pilotto, A. & Polidori, M. C. 2019 *The Multidimensional Prognostic Index in general practice: One-year follow-up study*. *International Journal of Clinical Practice* **73** (12), 1–9. <https://doi.org/10.1111/ijcp.13403>.
- Mumssen, Y., Saltiel, G. & Kingdom, B. 2018 *Aligning Institutions and Incentives for Sustainable Water Supply and Sanitation Services*. *Aligning Institutions and Incentives for Sustainable Water Supply and Sanitation Services*, (May). <https://doi.org/10.1596/29795>.
- Olivier, B. H. 2017 *The use of mixed-methods research to diagnose the organisational performance of a local government*. *SA Journal of Industrial Psychology* **43** (1), 1–14. <https://doi.org/10.4102/sajip.v43i0.1453>.
- Peal, A., Evans, B., Blackett, I., Hawkins, P. & Heymans, C. 2014 *Fecal sludge management (FSM): analytical tools for assessing FSM in cities*. *Journal of Water, Sanitation and Hygiene for Development* **4** (3), 371. <https://doi.org/10.2166/washdev.2014.139>.
- Rogers, B. C., Dunn, G., Hammer, K., Novalia, W., de Haan, F. J., Brown, L., Brown, R. R., Lloyd, S., Ulrich, C., Wong, T. H. F. & Chesterfield, C. 2020 *Water Sensitive Cities Index: A diagnostic tool to assess water sensitivity and guide management actions*. *Water Research* **186**, 116411. <https://doi.org/10.1016/j.watres.2020.116411>.
- Ross, I., Scott, R., Mujica, A., Smith, M. & White, Z. 2016 *Fecal Sludge Management: Diagnostics for Service Delivery in Urban Areas Tools and Guidelines*.
- Schulz, H. J., Hadlak, S. & Schumann, H. 2011 *The design space of implicit hierarchy visualization: a survey*. *IEEE Transactions on Visualization and Computer Graphics* **17** (4), 393–411. <https://doi.org/10.1109/TVCG.2010.79>.
- Schweitzer, R., Grayson, C. & Lockwood, H. 2014 Mapping of water, sanitation and hygiene sustainability tools. *Triple-S Working Papers*, 10(May), 43 p.; 7 fig.
- Scott, R. E., Ross, I., Hawkins, P., Blackett, I. & Smith, M. D. 2019 *Diagnostics for Assessing City-Wide Sanitation Services*. pp. 111–118. <https://doi.org/10.2166/washdev.2018.113>
- SNV and ISF-UTS 2016 *Exploring Legal and Policy Aspects of Urban Sanitation and Hygiene*.
- Stake, R. E. & Schwandt, T. A. 2011 On discerning quality in evaluation. In: *The SAGE Handbook of Evaluation*. pp. 405–418. <https://doi.org/10.4135/9781848608078.n18>
- Strande, L., Ronteltap, M. & Brdjanovic, D. 2014 *Faecal Sludge Management* (Vol. 9781780404).
- Subraya, B. M. & Subrahmanya, S. V. 2000 Object driven performance testing of Web applications. In: *Proceedings – 1st Asia-Pacific Conference on Quality Software, APAQS 2000*. pp. 17–26. <https://doi.org/10.1109/APAQ.2000.883774>.
- UNICEF 2020 *Review of the WASH Bottleneck Analysis Tool (BAT): Improving the WASH BAT as A Tool for Planning and Partnering for Sustainability*.
- UNICEF & WHO 2020 *State of the World's Sanitation: An Urgent Call to Transform Sanitation for Better Health, Environments, Economies and Societies*.

- United Nations Childrens Fund (UNICEF), & The World Bank Group 2014 Water, Sanitation and Hygiene Bottleneck Analysis Tool. *Online*, (May), 2014.
- UN-Water (GLAAS) and World Health Organisation 2019 *National Systems to Support Drinking-Water, Sanitation and Hygiene: Global Status Report 2019*.
- Water Supply and Sanitation Collaborative Council and World Health Organization 2005 *Sanitation and Hygiene Promotion: Programming Guidance*.
- WHO 2018 *Guidelines on Sanitation and Health*.
- WHO | UNICEF JMP 2021 *Progress on Household Drinking Water, Sanitation and Hygiene 2000–2020*.
- WSUP 2019 *Strengthening the Enabling Environment for Citywide Inclusive Water and Sanitation: an Evaluative Framework*.

First received 1 February 2021; accepted in revised form 15 May 2022. Available online 30 May 2022
